# Supplementary material for: Synthesis of PR-/RP-chain-based compliant mechanisms – design of applications exploiting fibre reinforced material characteristics
Source: Copernicus journal article supplement (doi:10.5194/ms-6-155-2015), 2015-08-25
Supplement: Supplementary file 5 [file fig_RPD.pdf › Bilder/fig_RPD.pdf]

rotations  $\rightarrow$  pole, angle

$a$  in reference to  $f$ ,  $\rightarrow P_{12}^{af}, \alpha_{12}^{af}$

$b$  in reference to  $f$ ,  $\rightarrow P_{12}^{bf}, \alpha_{12}^{bf}$

$a$  in reference to  $b$ ,  $\rightarrow P_{12}^{ab}, \alpha_{12}^{ab}$

angles

$$\alpha_{12}^{af} = \angle P_{12}^{ab} P_{12}^{af} P_{12}^{bf}$$

$$\alpha_{12}^{bf} = \angle P_{12}^{ab} P_{12}^{bf} P_{12}^{af}$$

$$\alpha_{12}^{ab} = \angle P_{12}^{af} P_{12}^{ab} P_{12}^{bf}$$

sign rule

$$\alpha_{12}^{af} = -\alpha_{12}^{fa}$$

sum

$$\alpha_{12}^{af} + \alpha_{12}^{fb} + \alpha_{12}^{ba} = 0$$

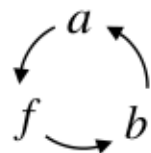

link lines

$$a_1(P_{12}^{af}, P_{12}^{ab})$$

$$b_1(P_{12}^{bf}, P_{12}^{ab})$$

$$f_1(P_{12}^{af}, P_{12}^{bf})$$

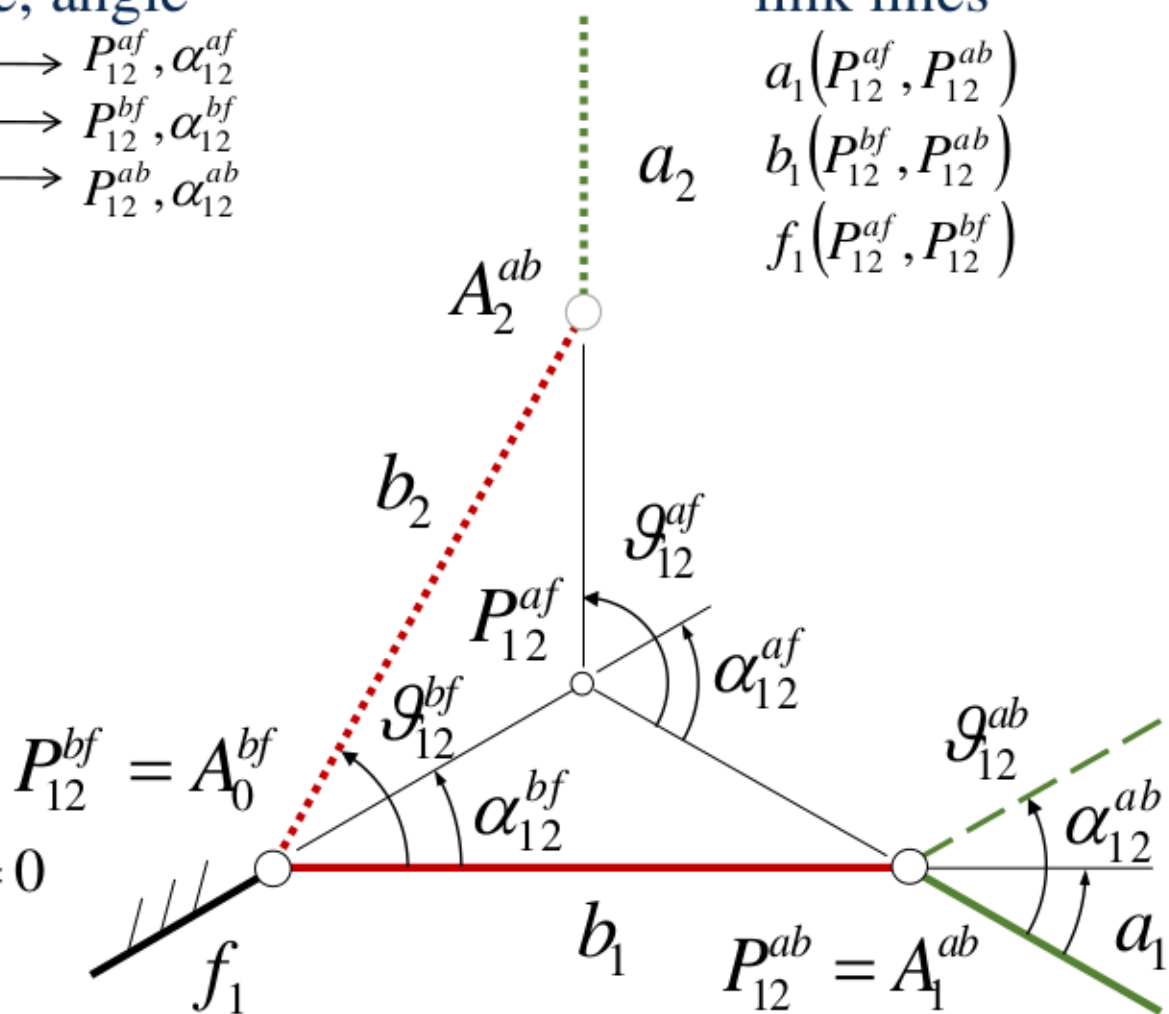

two positions of a RR-chain  $A_0^{bf} A_1^{ab}$
