# Supplementary material for: Synthesis of PR-/RP-chain-based compliant mechanisms – design of applications exploiting fibre reinforced material characteristics
Source: Copernicus journal article supplement (doi:10.5194/ms-6-155-2015), 2015-08-25
Supplement: Supplementary file [file ms-6-155-2015-supplement-title-page.pdf › ms-6-155-2015-supplement-title-page.pdf]

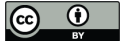

## *Supplement of*

# **Synthesis of PR-/RP-chain-based compliant mechanisms – design of applications exploiting fibre reinforced material characteristics**

**U. Hanke et al.**

*Correspondence to:* U. Hanke ([uwe.hanke@tu-dresden.de](mailto:uwe.hanke@tu-dresden.de))

- ms-6-155-2015-supplement-title-page.pdf
- Bilder
  - PR\_sol.pdf
  - RP\_sol.pdf
  - fig\_CH.pdf
  - fig\_PR-RP-synthesis.pdf
  - fig\_RPD.pdf
  - fig\_beam.pdf
  - fig\_beam\_calc.pdf
  - fig\_beam\_model.pdf
  - fig\_sol.pdf
  - fig\_sol\_assembly.pdf
- Hanke\_MS.tex
- copernicus.bst
- copernicus.cfg
- copernicus.cls
- natbib.sty
- pdfscreen.sty
- pdfscreencop.sty

The copyright of individual parts of the supplement might differ from the CC-BY 3.0 licence.
