# Supplementary figures and images for: Synthesis of PR-/RP-chain-based compliant mechanisms – design of applications exploiting fibre reinforced material characteristics
Source: Copernicus journal article supplement (doi:10.5194/ms-6-155-2015), 2015-08-25

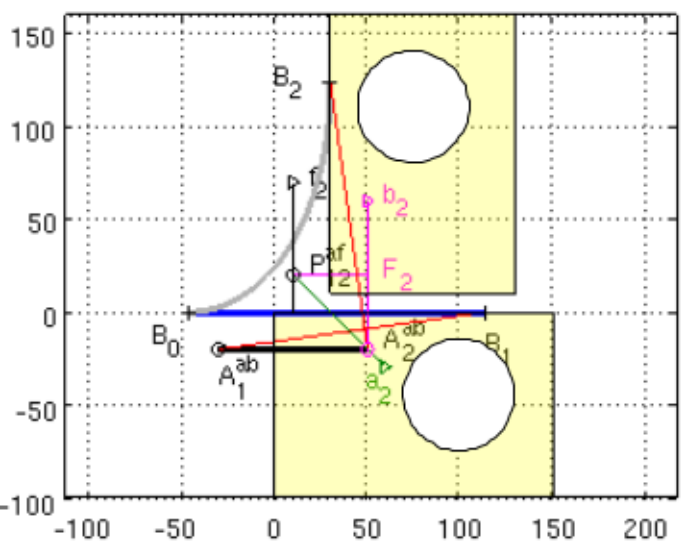

Supplement: Supplementary file 1 [file PR_sol.pdf › Bilder/PR_sol.pdf]

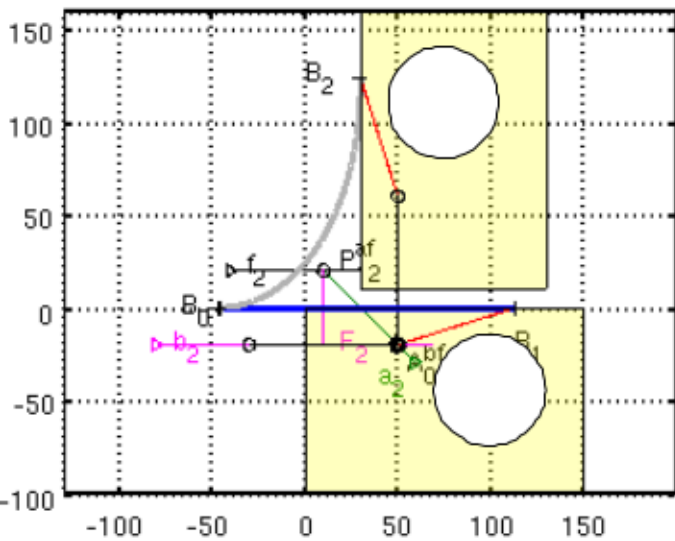

Supplement: Supplementary file 2 [file RP_sol.pdf › Bilder/RP_sol.pdf]

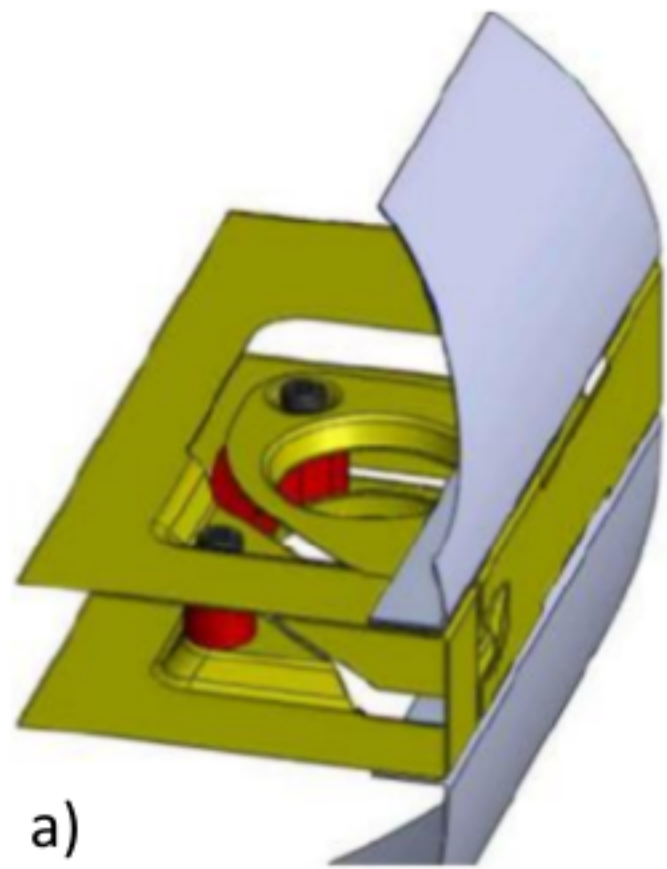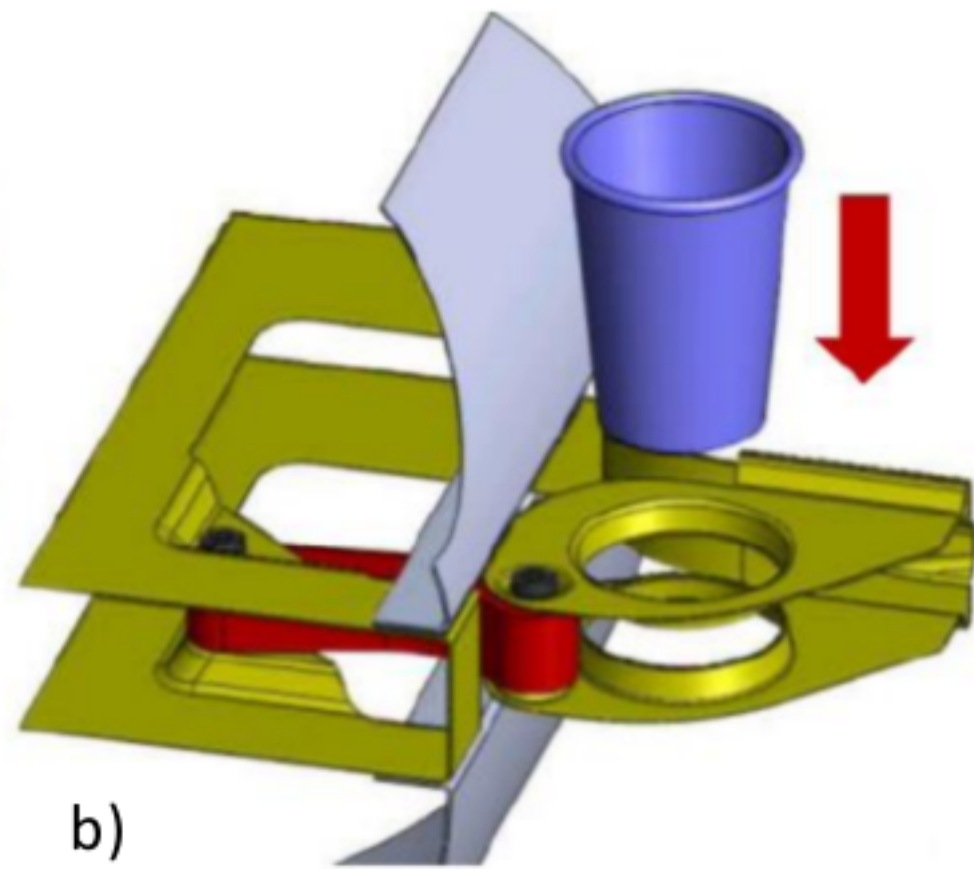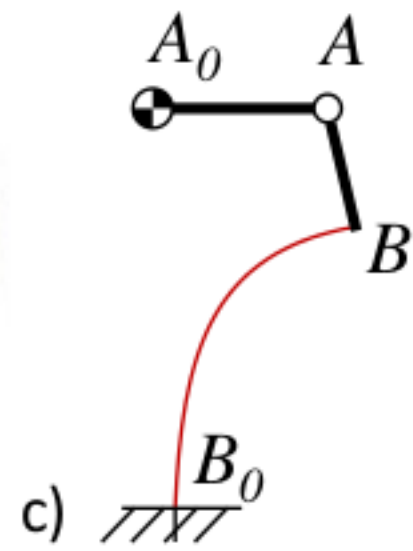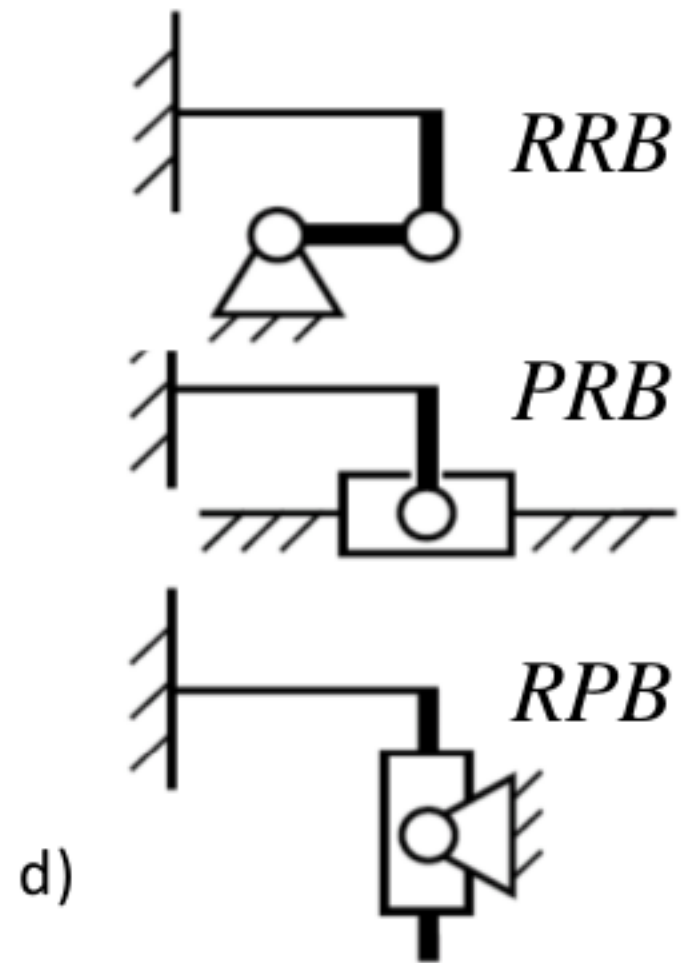

Supplement: Supplementary file 3 [file fig_CH.pdf › Bilder/fig_CH.pdf]

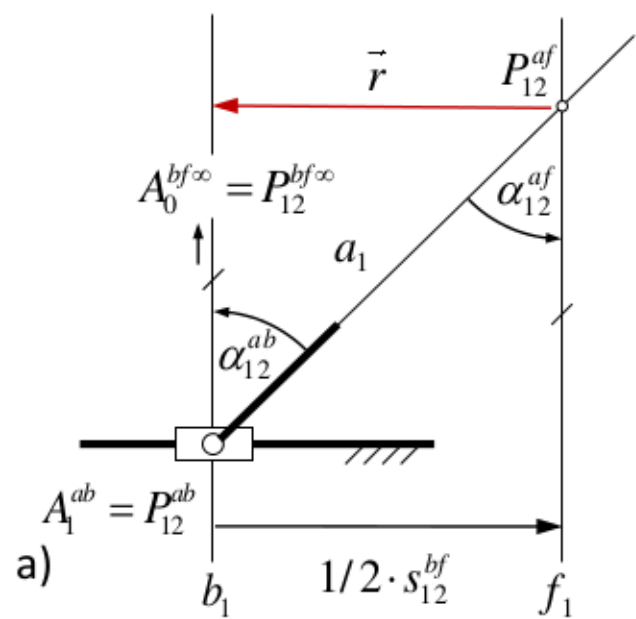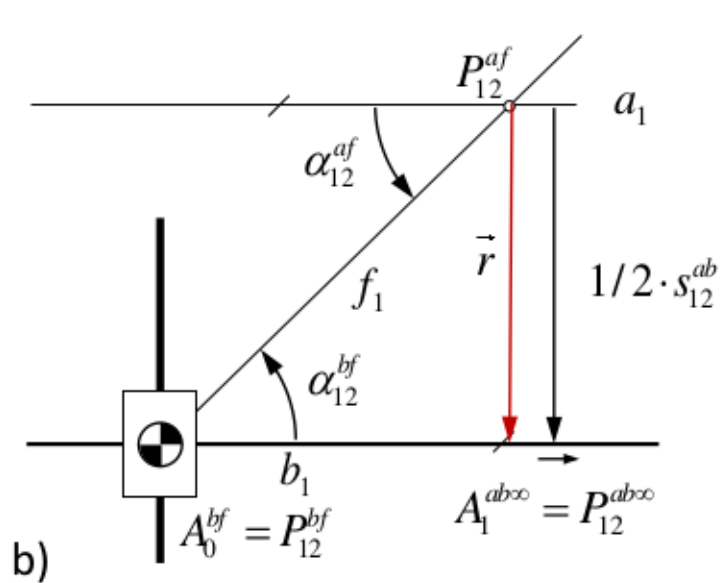

Supplement: Supplementary file 4 [file fig_PR-RP-synthesis.pdf › Bilder/fig_PR-RP-synthesis.pdf]

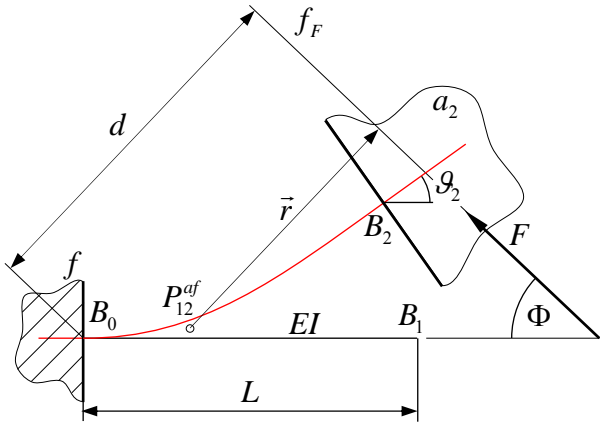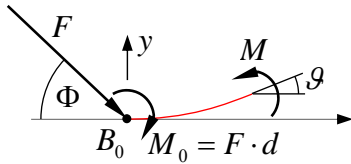

Supplement: Supplementary file 6 [file fig_beam.pdf › Bilder/fig_beam.pdf]

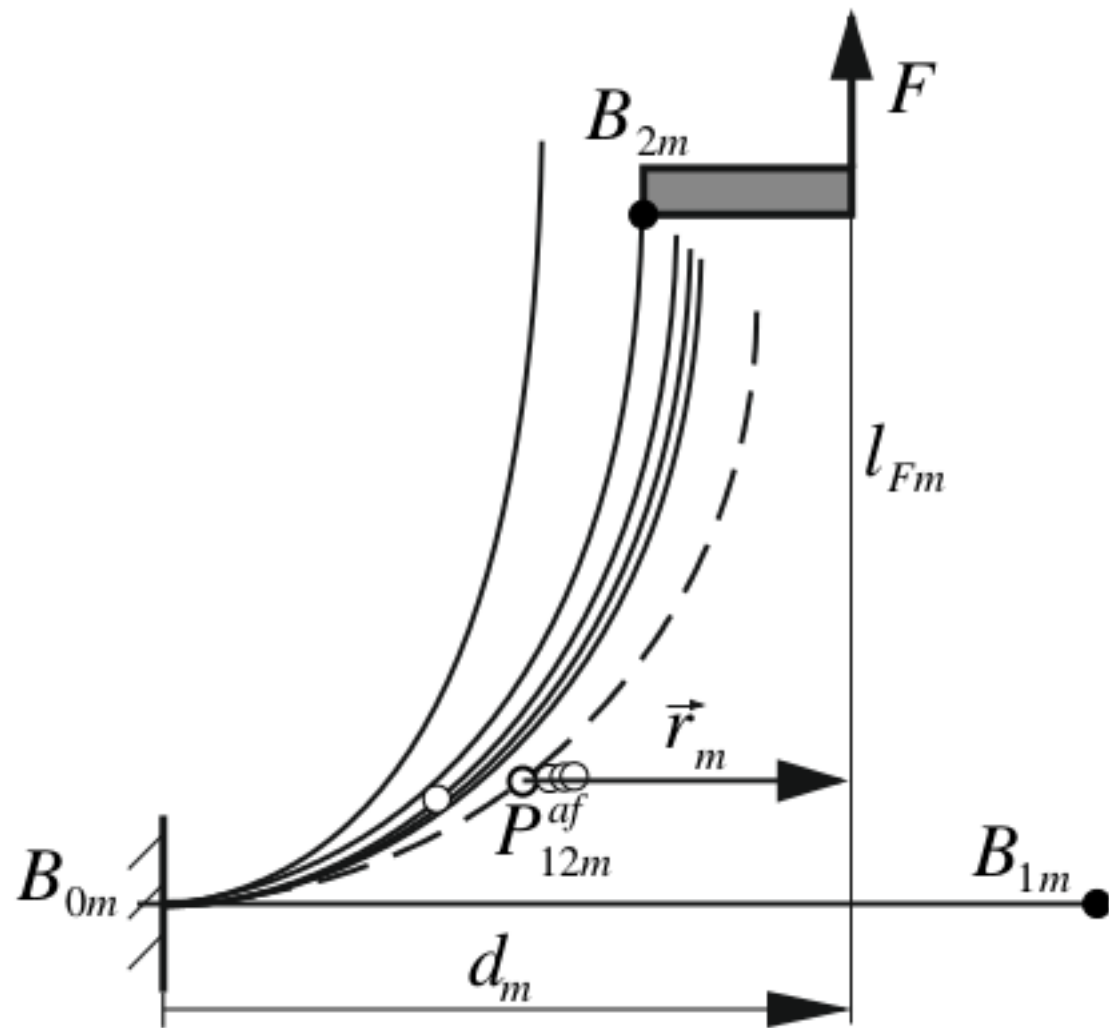

Supplement: Supplementary file 7 [file fig_beam_calc.pdf › Bilder/fig_beam_calc.pdf]

$Y_2$

$X_2$

$X_1$

$P_{12}$

$\vec{r}$

$B_0$

$B_1$

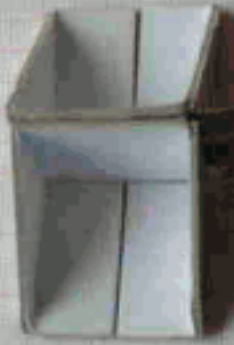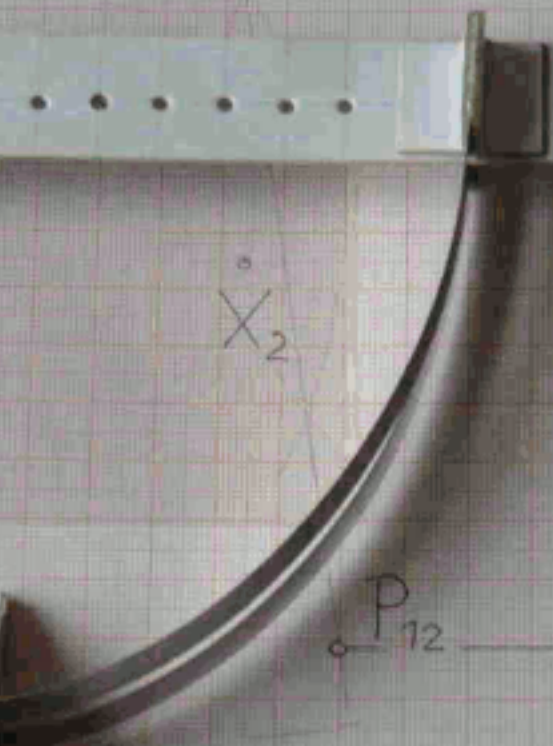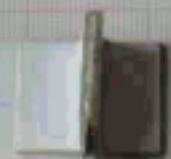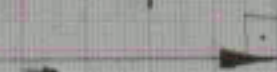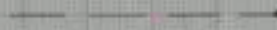

Supplement: Supplementary file 8 [file fig_beam_model.pdf › Bilder/fig_beam_model.pdf]

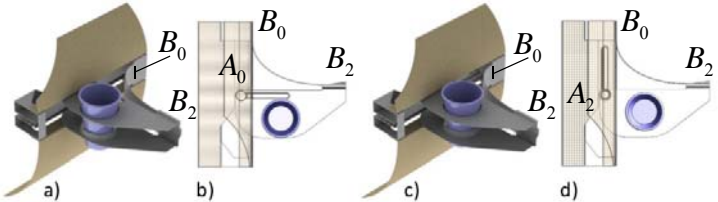

Supplement: Supplementary file 9 [file fig_sol.pdf › Bilder/fig_sol.pdf]

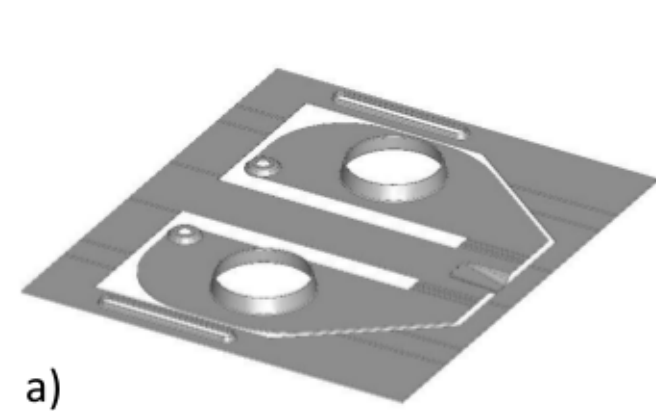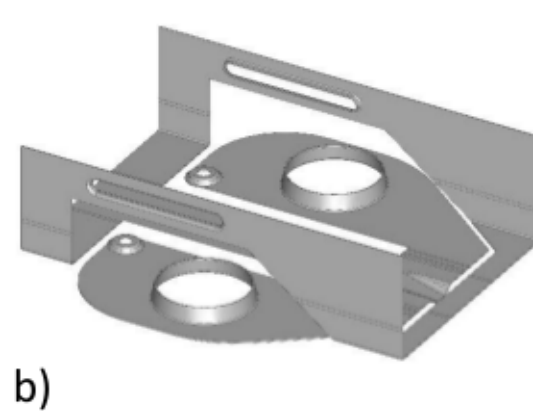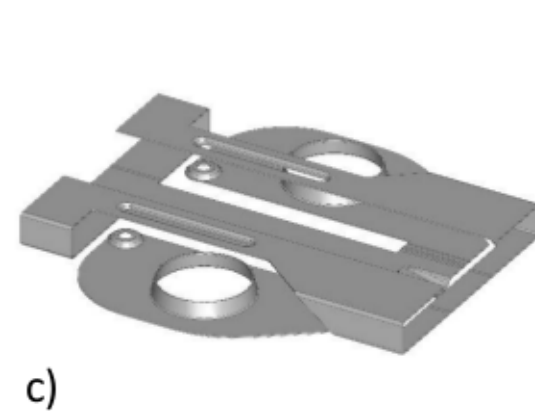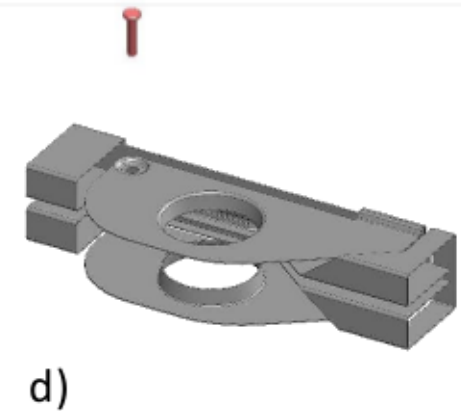

Supplement: Supplementary file 10 [file fig_sol_assembly.pdf › Bilder/fig_sol_assembly.pdf]
